# Supplementary material for: Preliminary mechanistic exploration of mitochondrial function in intestinal protection mediated by high-energy X-ray FLASH radiotherapy
Source: Research Square preprint supplement (doi:10.21203/rs.3.rs-7650752/v1), 2025-11-04
Supplement: Supplementary file 1 [file f4c6d2d08a3f7321d499f10a.docx]

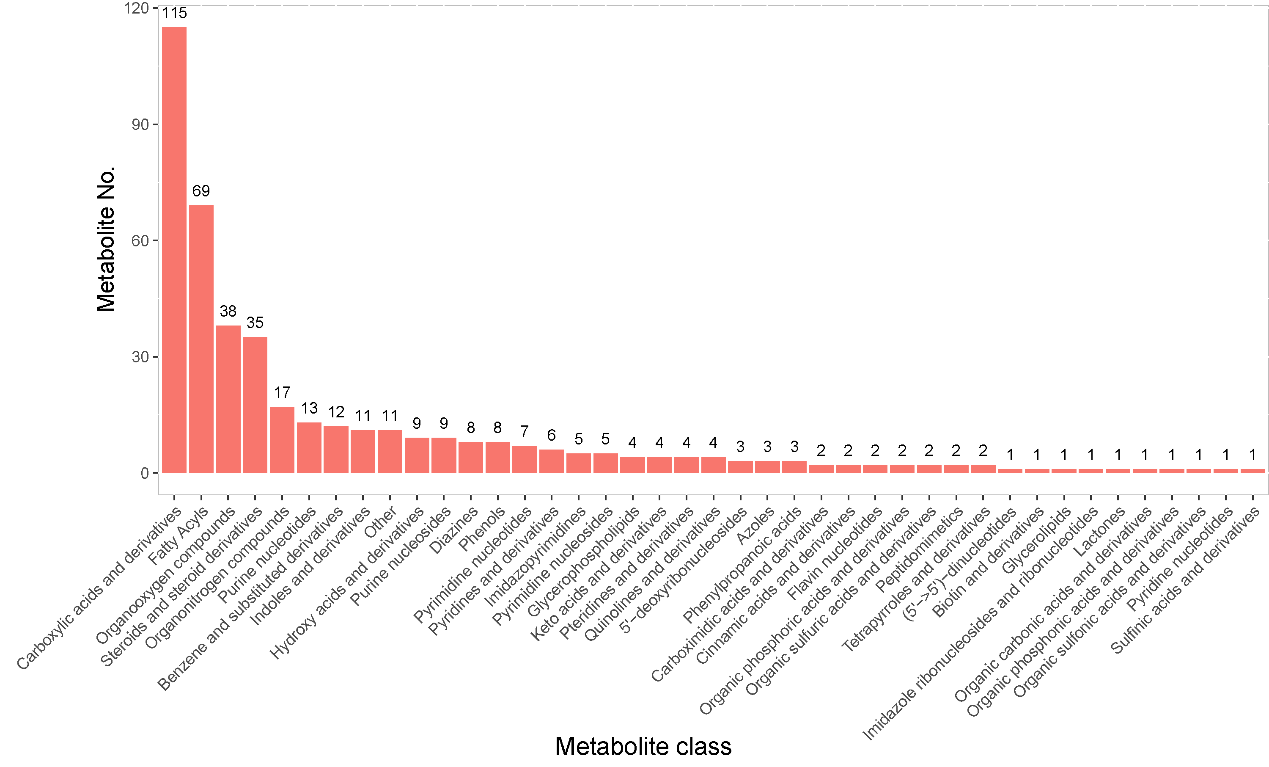


**Supplementary Fig. 1.** Metabolite class.

**Supplementary Table 1.** Irradiation parameters of experiments.

|  |  |  |  |  |
| --- | --- | --- | --- | --- |
|  | Unit | Control | FLASH-RT | CONV-RT |
| Sample size (n) | / | 15 | 15 | 15 |
| Field size | cm2 | / | 4 ×4 | 4 ×4 |
| Source surface distance (SSD) | cm | / | 50 | 50 |
| Beam energy | MeV | / | 10 | 10 |
| Dose delivered | Gy/1F | / | 12 | 12 |
| Mean dose rate | Gy/s | / | 200 | 0.185 |
| Pulse repetition frequency | Hz | / | 500 | 1 |

**Supplementary Table 2.** The actual irradiation dose for each mouse in the three irradiation mode groups.

| No. | FLASH-RT  Dose (Gy/F) | CONV-RT  Dose (Gy/F) | Control  Dose (Gy/F) |
| --- | --- | --- | --- |
| 1 | 11.88 | 12.21 | 0 |
| 2 | 12.04 | 11.94 | 0 |
| 3 | 12.13 | 12.1 | 0 |
| 4 | 12.01 | 11.93 | 0 |
| 5 | 11.81 | 12.16 | 0 |
| 6 | 11.9 | 12.02 | 0 |
| 7 | 11.93 | 11.92 | 0 |
| 8 | 12.16 | 12.18 | 0 |
| 9 | 11.96 | 12.09 | 0 |
| 10 | 12.04 | 11.94 | 0 |
| 11 | 11.99 | 12.14 | 0 |
| 12 | 12.23 | 12.1 | 0 |
| 13 | 12.18 | 11.89 | 0 |
| 14 | 11.9 | 11.9 | 0 |
| 15 | 12.03 | 11.86 | 0 |
| Mean ± SD | 12.01 ± 0.12 | 12.02 ± 0.12 | 0 |
